# Supplementary material
Source: HighWire-hosted journal article supplement (https://openheart.bmj.com/content/8/2/e001769)

## SUPPLEMENTAL APPENDIX

**Implementation of an early rule-out pathway for myocardial infarction using a high-sensitivity cardiac troponin T assay**

Dennis Sandeman, MSc<sup>a</sup>, Maaz BJ Syed, MBChB, MSc<sup>b</sup>, Dorian M Kimenai, PhD<sup>c</sup>,  
Kuan K Lee, MD<sup>b</sup>, Atul Anand, MD, PhD<sup>b</sup>, Shruti Joshi, MD<sup>b</sup>, Lorraine Dinnel<sup>a</sup>,  
Philip R Wenham, PhD, MCB, FRCPath<sup>d</sup>, Ken Campbell, FIBMS<sup>d</sup>, Mary Jarvie BSc<sup>d</sup>,  
Donna Galloway, MPhil<sup>d</sup>, Mhairi Anderson, BSc<sup>d</sup>, Bappa Roy, MB ChB FRCEM<sup>e</sup>,  
Jack PM Andrews, MD<sup>b</sup>, Fiona E Strachan, PhD<sup>b</sup>, Amy V Ferry, PhD<sup>b</sup>,  
Andrew R Chapman, MD, PhD<sup>b</sup>, Sarah Elsby, BSc<sup>f</sup>, Mark Francis, MD<sup>a</sup>, Robert Cargill, MD<sup>a</sup>,  
Anoop SV Shah, MD, PhD<sup>g</sup>, Nicholas L Mills, MD, PhD<sup>b,c</sup>

<sup>a</sup>Department of Cardiology, Victoria Hospital Kirkcaldy, Kirkcaldy, United Kingdom.

<sup>b</sup>BHF Centre for Cardiovascular Science, University of Edinburgh, Edinburgh, United Kingdom.

<sup>c</sup>Usher Institute, University of Edinburgh, Edinburgh, United Kingdom.

<sup>d</sup>Department of Clinical Biochemistry, Victoria Hospital, Kirkcaldy, United Kingdom.

<sup>e</sup>Emergency Department, Victoria Hospital, Kirkcaldy, United Kingdom.

<sup>f</sup>Information Services Department, Lynebank Hospital, Dunfermline, United Kingdom.

<sup>g</sup>Non Communicable Disease Epidemiology, London School of Hygiene and Tropical Medicine, United Kingdom

**Address for correspondence:**

Dennis Sandeman  
Cardiology Department  
Victoria Hospital  
Kirkcaldy  
United Kingdom  
KY52AH

Telephone: +44 1595 643355

Email: [dennis.sandeman@nhs.scot](mailto:dennis.sandeman@nhs.scot)

## Table and figure legends

### eTables:

**eTable 1.** Efficacy and safety endpoints stratified by phase and cardiac troponin concentration

**eTable 2.** Duration of stay comparing the intervention group to the standard care adjusted for age, sex and comorbidity. Data are provided for the whole population and stratified by troponin concentrations

### eFigures:

**eFigure 1.** Median length of stay before and after the implementation of the new pathway in individuals with hs-cTnT <5 ng/L and stratified into 3-month periods.

**eTable 1.** Efficacy and safety endpoints stratified by phase and cardiac troponin concentration

|                                            | Standard care               |                                               |                                                | Intervention                |                                               |                                                |
|--------------------------------------------|-----------------------------|-----------------------------------------------|------------------------------------------------|-----------------------------|-----------------------------------------------|------------------------------------------------|
|                                            | Whole Cohort<br>(n = 6,642) | Troponin T <14 ng/L on arrival<br>(n = 4,073) | Troponin T ≥ 14 ng/L on arrival<br>(n = 2,569) | Whole Cohort<br>(n = 3,673) | Troponin T <14 ng/L on arrival<br>(n = 2,325) | Troponin T ≥ 14 ng/L on arrival<br>(n = 1,348) |
| <b>Duration of hospital stay (minutes)</b> | 534<br>[220-2279]           | 295<br>[192-843]                              | 2259<br>[665-6054]                             | 390<br>[218-1910]           | 255<br>[190-509]                              | 2567<br>[688-6191]                             |
| <b>All-cause death</b>                     |                             |                                               |                                                |                             |                                               |                                                |
| 30 days                                    | 245 (3.7%)                  | 15 (0.4%)                                     | 230 (9.0%)                                     | 141 (3.8%)                  | 13 (0.6%)                                     | 128 (9.5%)                                     |
| 1 year                                     | 721 (10.9%)                 | 90 (2.2%)                                     | 631 (24.6%)                                    | 381 (10.4%)                 | 52 (2.2%)                                     | 329 (24.4%)                                    |
| <b>Cardiovascular death</b>                |                             |                                               |                                                |                             |                                               |                                                |
| 30 days                                    | 139 (2.1%)                  | 5 (0.1%)                                      | 134 (5.2%)                                     | 82 (2.2%)                   | 9 (0.4%)                                      | 73 (5.4%)                                      |
| 1 year                                     | 364 (5.5%)                  | 24 (0.6%)                                     | 340 (13.3%)                                    | 204 (5.6%)                  | 18 (0.8%)                                     | 186 (13.8%)                                    |

**eTable 2.** Association of early rule-out pathway with duration of hospital stay

|                                    | Beta    | (95% Confidence Interval) |         |   |          |
|------------------------------------|---------|---------------------------|---------|---|----------|
| Whole cohort                       |         |                           |         |   |          |
| Early rule-out pathway             | -0.0135 | (                         | -0.0244 | - | -0.0027) |
| Age                                | 0.0062  | (                         | 0.0059  | - | 0.0065)  |
| Sex (men)                          | 0.0025  | (                         | -0.0081 | - | 0.0132)  |
| History of myocardial infarction   | -0.0131 | (                         | -0.0346 | - | 0.0085)  |
| History of heart failure           | 0.0875  | (                         | 0.0606  | - | 0.1144)  |
| History of cerebrovascular disease | 0.0590  | (                         | 0.0160  | - | 0.1020)  |
| Diabetes Mellitus                  | 0.0454  | (                         | 0.0315  | - | 0.0592)  |
| Serum creatinine                   | 0.0007  | (                         | 0.0006  | - | 0.0008)  |
| Troponin T below 5 ng/L            |         |                           |         |   |          |
| Early rule-out pathway             | -0.0304 | (                         | -0.0442 | - | -0.0166) |
| Age                                | 0.0019  | (                         | 0.0013  | - | 0.0024)  |
| Sex (men)                          | -0.0132 | (                         | -0.0278 | - | 0.0014)  |
| History of myocardial infarction   | 0.0273  | (                         | -0.0122 | - | 0.0668)  |
| History of heart failure           | 0.0865  | (                         | -0.0247 | - | 0.1976)  |
| History of cerebrovascular disease | 0.2228  | (                         | 0.1066  | - | 0.3390)  |
| Diabetes Mellitus                  | 0.0587  | (                         | 0.0345  | - | 0.0829)  |
| Serum creatinine                   | 0.0003  | (                         | -0.0002 | - | 0.0007)  |
| Troponin T between 5 and 14 ng/L   |         |                           |         |   |          |
| Early rule-out pathway             | -0.0368 | (                         | -0.0545 | - | -0.0192) |
| Age                                | 0.0024  | (                         | 0.0016  | - | 0.0031)  |
| Sex (men)                          | -0.0236 | (                         | -0.0427 | - | -0.0046) |
| History of myocardial infarction   | -0.0367 | (                         | -0.0710 | - | -0.0024) |
| History of heart failure           | -0.0037 | (                         | -0.0704 | - | 0.0629)  |
| History of cerebrovascular disease | 0.0252  | (                         | -0.0519 | - | 0.1022)  |
| Diabetes Mellitus                  | 0.0170  | (                         | -0.0057 | - | 0.0397)  |
| Serum creatinine                   | 0.0004  | (                         | 0.0000  | - | 0.0008)  |
| Troponin T over 14 ng/L            |         |                           |         |   |          |
| Early rule-out pathway             | 0.0099  | (                         | -0.0095 | - | 0.0294)  |
| Age                                | 0.0022  | (                         | 0.0015  | - | 0.0029)  |
| Sex (men)                          | -0.0381 | (                         | -0.0573 | - | -0.0188) |
| History of myocardial infarction   | -0.0202 | (                         | -0.0526 | - | 0.0122)  |
| History of heart failure           | 0.0445  | (                         | 0.0119  | - | 0.0771)  |
| History of cerebrovascular disease | 0.0145  | (                         | -0.0427 | - | 0.0716)  |
| Diabetes Mellitus                  | 0.0064  | (                         | -0.0147 | - | 0.0275)  |
| Serum creatinine                   | 0.0003  | (                         | 0.0001  | - | 0.0004)  |

Data are presented as  $\beta$  (95% CI) The table presents the association of log-transformed duration of stay for intervention group as compared with standard care for the total study population, and stratified by patients with troponin levels below 5 ng/L, those who had troponin levels between 5 and 14 ng/L, and those who had troponin levels above 14 ng/L. The model is adjusted by age, sex, diabetes, creatinine, and history of myocardial infarction, heart failure or cerebrovascular disease.

eFigure 1

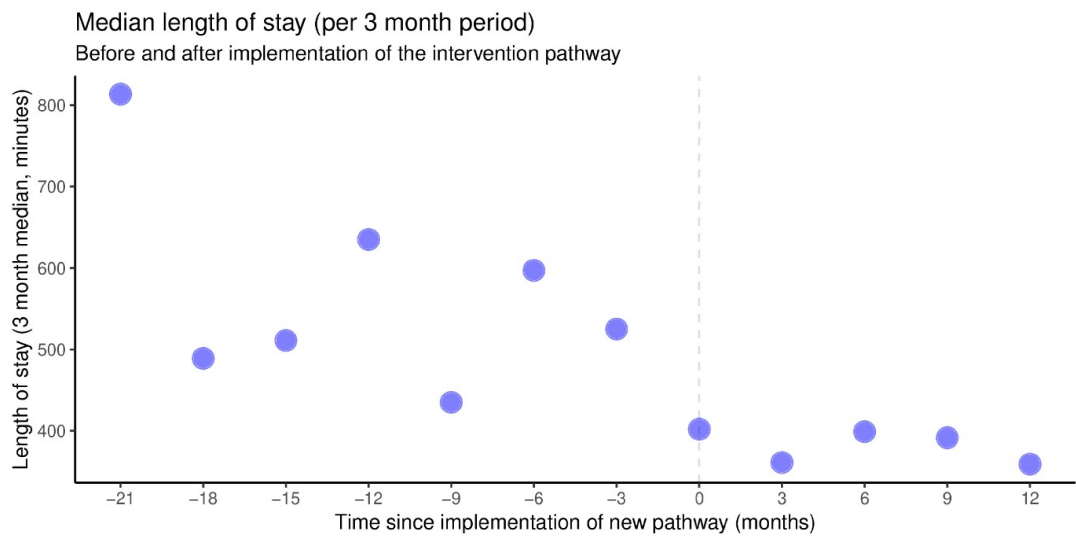

Supplement: inline-supplementary-material-1 [file inline-supplementary-material-1.pdf]
